# Supplementary material for: The walking speed-dependency of gait variability in bilateral vestibulopathy and its association with clinical tests of vestibular function
Source: PubMed Central journal article supplement (PMC6895118; doi:10.1038/s41598-019-54605-0), 2019-12-05
Supplement: 41598_2019_54605_MOESM1_ESM.pdf [file 41598_2019_54605_MOESM1_ESM.pdf]

*Supplementary Information for*

**The walking speed-dependency of gait variability in bilateral vestibulopathy and its association with clinical tests of vestibular function**

Scientific Reports

Christopher McCrum<sup>1,2\*</sup>, Florence Lucieer<sup>3</sup>, Raymond van de Berg<sup>3,4</sup>, Paul Willems<sup>1</sup>, Angélica Pérez Fornos<sup>5</sup>, Nils Guinand<sup>5</sup>, Kiros Karamanidis<sup>6</sup>, Herman Kingma<sup>3,4</sup>, Kenneth Meijer<sup>1</sup>

<sup>1</sup>Department of Nutrition and Movement Sciences, NUTRIM School of Nutrition and Translational Research in Metabolism, Maastricht University Medical Centre+, Maastricht, The Netherlands

<sup>2</sup>Institute of Movement and Sport Gerontology, German Sport University Cologne, Germany

<sup>3</sup>Division of Balance Disorders, Department of Otolaryngology, Head and Neck Surgery, Maastricht University Medical Centre+, Maastricht, The Netherlands

<sup>4</sup>Faculty of Physics, Tomsk State University, Tomsk, Russian Federation

<sup>5</sup>Service of Otorhinolaryngology and Head and Neck Surgery, Department of Clinical Neurosciences, Geneva University Hospitals, Geneva, Switzerland

<sup>6</sup>Sport and Exercise Science Research Centre, School of Applied Sciences, London South Bank University, London, UK

\*Correspondence:

Christopher McCrum

Department of Nutrition and Movement Sciences

Maastricht University,

PO Box 616, Maastricht, 6200 MD, The Netherlands

Phone: +31433881621

Email: [chris.mccrum@maastrichtuniversity.nl](mailto:chris.mccrum@maastrichtuniversity.nl)

**Supplementary Table 1: Bonferroni pairwise between group comparison results for the means of the gait parameters**

| Walking Speed<br>(m/s) | Groups          | Step Time Means |                       |                  | Step Length Means |                        |                  | Double Support Time Means |                        |                   | Step Width Means |                      |                  |
|------------------------|-----------------|-----------------|-----------------------|------------------|-------------------|------------------------|------------------|---------------------------|------------------------|-------------------|------------------|----------------------|------------------|
|                        |                 | Mean Diff.      | 95.00% CI of diff.    | Adjusted P Value | Mean Diff.        | 95.00% CI of diff.     | Adjusted P Value | Mean Diff.                | 95.00% CI of diff.     | Adjusted P Value  | Mean Diff.       | 95.00% CI of diff.   | Adjusted P Value |
| 0.4                    | BVP vs. Young   | -0.1579         | -0.2419 to -0.07384   | <b>0.0001</b>    | -0.06307          | -0.09654 to -0.02960   | <b>0.0001</b>    | -0.07791                  | -0.1170 to -0.03885    | <b>&lt;0.0001</b> | 0.03707          | 0.003385 to 0.07075  | <b>0.0268</b>    |
|                        | BVP vs. Older   | -0.09576        | -0.1938 to 0.002244   | 0.057            | -0.03835          | -0.07742 to 0.0007265  | 0.0556           | -0.02706                  | -0.07522 to 0.02110    | 0.4786            | 0.03175          | -0.009976 to 0.07347 | 0.1867           |
|                        | Young vs. Older | 0.06212         | -0.04178 to 0.1660    | 0.4046           | 0.02472           | -0.01663 to 0.06607    | 0.4044           | 0.05086                   | 0.0008404 to 0.1009    | <b>0.0454</b>     | -0.00532         | -0.04651 to 0.03587  | >0.9999          |
| 0.6                    | BVP vs. Young   | -0.09504        | -0.1465 to -0.04361   | <b>0.0002</b>    | -0.05714          | -0.08806 to -0.02622   | <b>0.0002</b>    | -0.03592                  | -0.05997 to -0.01188   | <b>0.0024</b>     | 0.02883          | -0.006725 to 0.06439 | 0.1482           |
|                        | BVP vs. Older   | -0.05925        | -0.1277 to 0.009149   | 0.1047           | -0.03606          | -0.07720 to 0.005079   | 0.099            | -0.01187                  | -0.03891 to 0.01517    | 0.7921            | 0.03253          | -0.01095 to 0.07602  | 0.2005           |
|                        | Young vs. Older | 0.03579         | -0.03479 to 0.1064    | 0.5979           | 0.02108           | -0.02143 to 0.06358    | 0.627            | 0.02405                   | -0.006358 to 0.05446   | 0.1572            | 0.003702         | -0.03852 to 0.04592  | >0.9999          |
| 0.8                    | BVP vs. Young   | -0.05854        | -0.09343 to -0.02365  | <b>0.0004</b>    | -0.04711          | -0.07525 to -0.01898   | <b>0.0005</b>    | -0.01993                  | -0.03893 to -0.0009376 | <b>0.0374</b>     | 0.01668          | -0.02021 to 0.05358  | 0.7954           |
|                        | BVP vs. Older   | -0.0398         | -0.08653 to 0.006931  | 0.1149           | -0.03217          | -0.06972 to 0.005381   | 0.1118           | -0.009608                 | -0.02740 to 0.008184   | 0.5388            | 0.02243          | -0.01548 to 0.06034  | 0.4394           |
|                        | Young vs. Older | 0.01874         | -0.02655 to 0.06403   | 0.8688           | 0.01494           | -0.02150 to 0.05138    | 0.8821           | 0.01033                   | -0.01040 to 0.03105    | 0.6294            | 0.005752         | -0.03036 to 0.04187  | >0.9999          |
| 1                      | BVP vs. Young   | -0.05273        | -0.08212 to -0.02334  | <b>0.0002</b>    | -0.05325          | -0.08276 to -0.02374   | <b>0.0002</b>    | -0.0124                   | -0.02665 to 0.001852   | 0.1062            | 0.01449          | -0.02451 to 0.05349  | >0.9999          |
|                        | BVP vs. Older   | -0.02875        | -0.06112 to 0.003616  | 0.0959           | -0.02911          | -0.06122 to 0.002991   | 0.0864           | -0.00682                  | -0.02207 to 0.008430   | 0.7972            | 0.0166           | -0.02325 to 0.05645  | 0.9078           |
|                        | Young vs. Older | 0.02398         | -0.006335 to 0.05429  | 0.1569           | 0.02413           | -0.006074 to 0.05434   | 0.1507           | 0.005578                  | -0.009967 to 0.02112   | >0.9999           | 0.002111         | -0.03669 to 0.04091  | >0.9999          |
| 1.2                    | BVP vs. Young   | -0.03527        | -0.05426 to -0.01627  | <b>0.0002</b>    | -0.04224          | -0.06470 to -0.01978   | <b>0.0001</b>    | -0.004739                 | -0.01834 to 0.008861   | >0.9999           | 0.01157          | -0.02591 to 0.04906  | >0.9999          |
|                        | BVP vs. Older   | -0.01281        | -0.03491 to 0.009291  | 0.4441           | -0.01505          | -0.04133 to 0.01123    | 0.4584           | -0.001326                 | -0.01452 to 0.01187    | >0.9999           | 0.01897          | -0.02107 to 0.05900  | 0.7251           |
|                        | Young vs. Older | 0.02246         | -0.0008739 to 0.04579 | 0.0618           | 0.02719           | -0.0004576 to 0.05483  | 0.0549           | 0.003413                  | -0.01246 to 0.01929    | >0.9999           | 0.007391         | -0.03035 to 0.04514  | >0.9999          |
| 1.4                    | BVP vs. Young   | -0.02955        | -0.04798 to -0.01112  | <b>0.001</b>     | -0.04111          | -0.06684 to -0.01537   | <b>0.001</b>     | -0.002945                 | -0.01446 to 0.008574   | >0.9999           | 0.01293          | -0.02312 to 0.04897  | >0.9999          |
|                        | BVP vs. Older   | -0.009134       | -0.02823 to 0.009961  | 0.7002           | -0.01253          | -0.03915 to 0.01409    | 0.7227           | -0.003735                 | -0.01521 to 0.007745   | >0.9999           | 0.009436         | -0.03317 to 0.05204  | >0.9999          |
|                        | Young vs. Older | 0.02042         | 0.0001919 to 0.04065  | <b>0.0474</b>    | 0.02858           | 0.0003932 to 0.05676   | <b>0.0461</b>    | -0.00079                  | -0.01374 to 0.01216    | >0.9999           | -0.00349         | -0.04146 to 0.03448  | >0.9999          |
| 1.6                    | BVP vs. Young   | -0.01865        | -0.03602 to -0.001278 | <b>0.0324</b>    | -0.02908          | -0.05752 to -0.0006455 | <b>0.0438</b>    | -0.001623                 | -0.01276 to 0.009513   | >0.9999           | 0.005952         | -0.03517 to 0.04707  | >0.9999          |
|                        | BVP vs. Older   | -0.006196       | -0.02836 to 0.01597   | >0.9999          | -0.01025          | -0.04572 to 0.02522    | >0.9999          | -0.002359                 | -0.01579 to 0.01108    | >0.9999           | 0.002257         | -0.03830 to 0.04282  | >0.9999          |
|                        | Young vs. Older | 0.01245         | -0.01100 to 0.03591   | 0.5373           | 0.01883           | -0.01903 to 0.05669    | 0.6219           | -0.000736                 | -0.01479 to 0.01332    | >0.9999           | -0.003695        | -0.03929 to 0.03190  | >0.9999          |

**Supplementary Table 2: Bonferroni pairwise between group comparison results for the coefficients of variation of the gait parameters**

| Walking Speed<br>(m/s) | Groups          | Step Time<br>CV |                    |                   | Step Length<br>CV |                     |                   | Double Support Time<br>CV |                    |                  | Step Width<br>CV |                    |                   |
|------------------------|-----------------|-----------------|--------------------|-------------------|-------------------|---------------------|-------------------|---------------------------|--------------------|------------------|------------------|--------------------|-------------------|
|                        |                 | Mean Diff.      | 95.00% CI of diff. | Adjusted P Value  | Mean Diff.        | 95.00% CI of diff.  | Adjusted P Value  | Mean Diff.                | 95.00% CI of diff. | Adjusted P Value | Mean Diff.       | 95.00% CI of diff. | Adjusted P Value  |
| 0.4                    | BVP vs. Young   | 1.271           | -0.09019 to 2.631  | 0.073             | 2.791             | 0.8092 to 4.773     | <b>0.004</b>      | 4.523                     | 1.343 to 7.704     | <b>0.0033</b>    | 0.7604           | -2.313 to 3.834    | >0.9999           |
|                        | BVP vs. Older   | 0.3193          | -1.749 to 2.388    | >0.9999           | 1.611             | -1.029 to 4.252     | 0.3731            | 1.269                     | -4.099 to 6.637    | >0.9999          | 1.46             | -3.380 to 6.299    | >0.9999           |
|                        | Young vs. Older | -0.9513         | -3.125 to 1.222    | 0.79              | -1.18             | -3.990 to 1.630     | 0.8556            | -3.254                    | -8.710 to 2.201    | 0.3927           | 0.6991           | -4.033 to 5.432    | >0.9999           |
| 0.6                    | BVP vs. Young   | 1.355           | 0.4934 to 2.216    | <b>0.0009</b>     | 2.699             | 1.153 to 4.246      | <b>0.0004</b>     | 3.953                     | 1.783 to 6.123     | <b>0.0001</b>    | 4.984            | 0.9730 to 8.994    | <b>0.0102</b>     |
|                        | BVP vs. Older   | 0.9247          | -0.5926 to 2.442   | 0.3752            | 1.704             | -0.3164 to 3.724    | 0.1182            | 2.94                      | -1.040 to 6.920    | 0.1989           | 4.169            | -1.194 to 9.531    | 0.1745            |
|                        | Young vs. Older | -0.4301         | -1.909 to 1.049    | >0.9999           | -0.9957           | -3.101 to 1.109     | 0.691             | -1.013                    | -4.941 to 2.915    | >0.9999          | -0.8149          | -5.417 to 3.787    | >0.9999           |
| 0.8                    | BVP vs. Young   | 1.201           | 0.5513 to 1.850    | <b>&lt;0.0001</b> | 2.606             | 1.459 to 3.754      | <b>&lt;0.0001</b> | 3.473                     | 1.361 to 5.586     | <b>0.0006</b>    | 10.67            | 4.704 to 16.64     | <b>0.0002</b>     |
|                        | BVP vs. Older   | 0.5263          | -0.6012 to 1.654   | 0.7134            | 1.15              | -0.3300 to 2.630    | 0.1724            | 2.72                      | 0.03094 to 5.410   | <b>0.0468</b>    | 6.319            | -3.386 to 16.02    | 0.3216            |
|                        | Young vs. Older | -0.6742         | -1.725 to 0.3768   | 0.3065            | -1.456            | -2.859 to -0.05344  | <b>0.0404</b>     | -0.7528                   | -3.407 to 1.901    | >0.9999          | -4.355           | -12.93 to 4.216    | 0.5519            |
| 1                      | BVP vs. Young   | 0.8551          | 0.01044 to 1.700   | <b>0.0466</b>     | 2.091             | 0.9474 to 3.234     | <b>0.0001</b>     | 3.203                     | 0.5901 to 5.815    | <b>0.012</b>     | 12.86            | 6.892 to 18.83     | <b>&lt;0.0001</b> |
|                        | BVP vs. Older   | 0.2881          | -0.5151 to 1.091   | >0.9999           | 0.8791            | -0.4269 to 2.185    | 0.2971            | 1.236                     | -1.258 to 3.731    | 0.6655           | 11.18            | 4.064 to 18.29     | <b>0.001</b>      |
|                        | Young vs. Older | -0.567          | -1.513 to 0.3790   | 0.4038            | -1.212            | -2.416 to -0.007390 | <b>0.0483</b>     | -1.966                    | -4.525 to 0.5927   | 0.177            | -1.681           | -6.651 to 3.289    | >0.9999           |
| 1.2                    | BVP vs. Young   | 0.6428          | 0.1572 to 1.128    | <b>0.0058</b>     | 1.579             | 0.7094 to 2.448     | <b>0.0002</b>     | 2.907                     | 0.8770 to 4.937    | <b>0.0027</b>    | 14.37            | 8.318 to 20.42     | <b>&lt;0.0001</b> |
|                        | BVP vs. Older   | 0.2557          | -0.3420 to 0.8533  | 0.8616            | 0.7506            | -0.01438 to 1.515   | 0.056             | 1.651                     | -0.1934 to 3.495   | 0.0932           | 11.22            | 3.168 to 19.27     | <b>0.0038</b>     |
|                        | Young vs. Older | -0.3872         | -0.9284 to 0.1541  | 0.2271            | -0.8281           | -1.647 to -0.009037 | <b>0.047</b>      | -1.256                    | -2.748 to 0.2368   | 0.1194           | -3.15            | -9.550 to 3.250    | 0.6027            |
| 1.4                    | BVP vs. Young   | 0.7897          | 0.3740 to 1.205    | <b>&lt;0.0001</b> | 1.492             | 0.7862 to 2.198     | <b>&lt;0.0001</b> | 2.492                     | 0.1591 to 4.824    | <b>0.0329</b>    | 15.22            | 7.806 to 22.63     | <b>&lt;0.0001</b> |
|                        | BVP vs. Older   | 0.4487          | -0.02622 to 0.9237 | 0.0695            | 0.6927            | 0.01951 to 1.366    | <b>0.0419</b>     | 1.558                     | -0.6551 to 3.771   | 0.2584           | 13.38            | 4.020 to 22.74     | <b>0.0029</b>     |
|                        | Young vs. Older | -0.341          | -0.7297 to 0.04760 | 0.0983            | -0.7993           | -1.422 to -0.1769   | <b>0.0092</b>     | -0.9334                   | -3.036 to 1.170    | 0.7864           | -1.842           | -9.031 to 5.347    | >0.9999           |
| 1.6                    | BVP vs. Young   | 0.4406          | 0.06548 to 0.8158  | <b>0.0169</b>     | 0.923             | 0.2817 to 1.564     | <b>0.0029</b>     | 2.356                     | 0.3356 to 4.376    | <b>0.0178</b>    | 13.11            | 5.274 to 20.95     | <b>0.0005</b>     |
|                        | BVP vs. Older   | 0.1737          | -0.2706 to 0.6179  | 0.9734            | 0.3466            | -0.2665 to 0.9596   | 0.4899            | 1.059                     | -1.125 to 3.243    | 0.6811           | 14.73            | 7.518 to 21.94     | <b>&lt;0.0001</b> |
|                        | Young vs. Older | -0.267          | -0.7029 to 0.1690  | 0.3732            | -0.5765           | -1.174 to 0.02123   | 0.0611            | -1.297                    | -3.418 to 0.8240   | 0.3782           | 1.619            | -3.208 to 6.447    | >0.9999           |

**Supplementary Table 3: Bonferroni pairwise between BVP All Gait vs. BVP Part Gait comparison results for the coefficients of variation of the gait parameters**

| Walking Speed<br>(m/s) | Step Time<br>CV |                    |                  | Step Length<br>CV |                    |                  | Double Support Time<br>CV |                    |                  | Step Width<br>CV |                    |                  |
|------------------------|-----------------|--------------------|------------------|-------------------|--------------------|------------------|---------------------------|--------------------|------------------|------------------|--------------------|------------------|
|                        | Mean Diff.      | 95.00% CI of diff. | Adjusted P Value | Mean Diff.        | 95.00% CI of diff. | Adjusted P Value | Mean Diff.                | 95.00% CI of diff. | Adjusted P Value | Mean Diff.       | 95.00% CI of diff. | Adjusted P Value |
| 0.4                    | -1.572          | -3.820 to 0.6765   | 0.3059           | -3.163            | -6.032 to -0.2933  | <b>0.0259</b>    | -4.748                    | -11.28 to 1.787    | 0.2531           | -0.4195          | -6.080 to 5.241    | >0.9999          |
| 0.6                    | -1.259          | -3.216 to 0.6981   | 0.4225           | -2.432            | -5.321 to 0.4568   | 0.1305           | -2.8                      | -7.624 to 2.024    | 0.5944           | -1.423           | -11.73 to 8.881    | >0.9999          |
| 0.8                    | -1.241          | -2.925 to 0.4423   | 0.2441           | -1.864            | -4.438 to 0.7090   | 0.2652           | -3.054                    | -7.209 to 1.100    | 0.2551           | 1.35             | -12.73 to 15.42    | >0.9999          |
| 1                      | -0.7285         | -2.039 to 0.5822   | 0.684            | -1.316            | -4.399 to 1.768    | >0.9999          | -3.068                    | -9.497 to 3.361    | 0.9497           | -1.021           | -16.51 to 14.47    | >0.9999          |
| 1.2                    | -0.3443         | -1.341 to 0.6527   | >0.9999          | -0.202            | -1.677 to 1.273    | >0.9999          | -1.29                     | -5.509 to 2.930    | >0.9999          | -6.166           | -23.90 to 11.57    | >0.9999          |
| 1.4                    | -1.089          | -2.639 to 0.4610   | 0.212            | -1.134            | -3.709 to 1.440    | 0.8482           | -5.092                    | -15.66 to 5.471    | 0.6228           | -8.85            | -39.64 to 21.94    | >0.9999          |
